# Supplementary material
Source: PubMed Central journal article supplement (PMC5766963)
Supplement: 10.1074_M117.815639_jbc.M117.815639-1.pdf [file 10.1074_M117.815639_jbc.M117.815639-1.pdf]

# **Restricting DNA Access Reveals Origin Licensing Dynamics and Sequence Dependence**

Megan D. Warner<sup>1</sup>, Ishara F. Azmi<sup>1</sup>, Sukhyun Kang<sup>1,2</sup>, Yanding Zhao<sup>3,4</sup> and Stephen P. Bell<sup>1</sup>

## **Supplemental Information**

Figures S1 – S14

Tables S1-S3

References cited in Supplemental Information

# Figure S1

-710 bead-biotin-GATCGGTGCG

-700 GGCCTCTTCGCTATTACGCCAGCTGGCGAAAGGGGGATGTGCTGCAAGGC  
-650 GATTAAGTTGGGTAACGCCAGGGTTTTCCAGTCACGACGTTGTAAAACG  
-600 ACGGCCAGTGAATTCCACATGTTAAAATAGTGAAGGAGCATGTTTCGGCAC  
-550 ACAGTGGACCGAACGTGGGGTAAGTGCCTAGGGTCCGGTTAAACGGATC  
-500 TCGCATTGATGAGGCAACGCTAATTATCAACATATAGATTGTTATCTATC  
-450 TGCATGAACACGAAATCTTTACTTGACGACTTGAGGCTGATGGTGTTTAT  
-400 GCAAAGAAACCACTGTGTTTAATATGTGTCCTGTTTATGATATTACTGTCA  
-350 GCGTAGAAGATAATAGTAAAAGCGGTTAATAAGTGTATTTGAGATAAGTG  
-300 TGATAAAGTTTTTACAGCGAAAAGACGATAAATACAAGAAAATGATTACG  
-250 AGGATACGGAGAGAGGTATGTACATGTGTATTTATATACTAAGCTGCCGG  
-200 CGGTTGTTTGCAAGACCGAGAAAAGGCTAGCAAGAATCGGGTCATTGTAG  
-150 CGTATGCGCCTGTGAACATTCTCTTCAACAAGTTTGATTCCATTGCGGTG  
-100 AAATGGTAAAAGTCAACCCCTGCGATGTATATTTTCCTGTACAATCAAT  
-50 CAAAAAGCCAAATGATTTAGCATTATCTTTACATCTTGTTATTTTACAGA  
+1 TTTTATGTTTATGATCTTTTATGCTTGCTTTTCAAAAGGCCTGCAGGCAAG  
ACS B1  
+51 TGCACAAACAATACTTAAATAAATACTACTCAGTAATAACCTATTTCTTA  
B2  
+101 GCATTTTTGACGAAATTGCTATTTTGTTAGAGTCTTTTACACCATTTGT  
B3  
+151 CTCCACACCTCCGCTTACATCAACACCAATAACGCCATTTAATCTAAGCG  
+201 CATCACCAACATTTTCTGGCGTCAGTCCACCAGCTAACATAAAATGTAAG  
+251 CTTCGGGGCTCTCTTGCCCTCCAACCCAGTCAGTGAAGTTGACTATATC  
+301 TTATAGATATC . . . . . TALE binding site

## **ARS1 containing DNA template used in helicase-loading assays.**

Sequence of the T-rich strand of *ARS1* DNA used in helicase loading and OCCM formation assays. Black DNA sequence is *ARS1* DNA and the surrounding yeast DNA sequence. Red DNA sequence is non-yeast DNA. Blue boxes surround the indicated elements of *ARS1*. The gray box surrounds the TALE DNA binding site that is present in the experiments in Figures 1 and 2. This element is present in alternate locations in the templates used in Figures 4 and 5 (see Figure S6).

## Figure S2

**A**

```

...TTTGATTCCATTGCGGTGAAATGGTAAAAGTCAACCCCTGCGATGTAT

ATTTTCCTGTACAATCAATCAAAAAGCCAAATGATTTAGCATTATCTTTAC
                                     -34   -25   -20

ATCTTGTTATTTLACAGATTATGTTTAGATCTTTTATGCTTGCTTTTCA
-15  -10  -5      ACS      +14      +23  B1  +31
AAAGCCTGCAGGCAGTGCACAAACAATACTTAAATAAATACTACTCAGT
+38   +47   +58   B2
AATAACCTATTTCTTAGCATTTTTGACGAAATTGCTATTTTGG...TALE or
                                     B3      M.HpaII
  
```

**B**

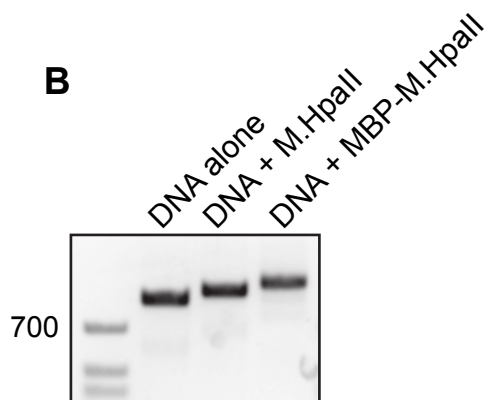

### Location and extent of M.HpaII modification of *ARS1* DNA.

**A)** Sequence of the T-rich strand of *ARS1* DNA showing the locations of 5FdC-modified M.HpaII consensus sequence placement. Important features of *ARS1* are highlighted in red and labeled. Grey boxes identify sequences that were modified to the CCGG M.HpaII recognition motif. The number assigned to that location is written below each box. DNA residues in blue represent the exact location of the 5FdC to which M.HpaII was crosslinked.

**B)** M.HpaII crosslinking is quantitative. M.HpaII or MBP-M.HpaII was incubated with DNA containing a 5FdC-modified M.HpaII-recognition sequence and the resulting template was separated on a 1.5% agarose gel containing ethidium bromide. All detectable DNA template exhibits a shift when incubated with either M.HpaII or MBP-M.HpaII, indicating crosslinking of M.HpaII to the DNA was complete, as has been previously reported (1, 2).

## Figure S3

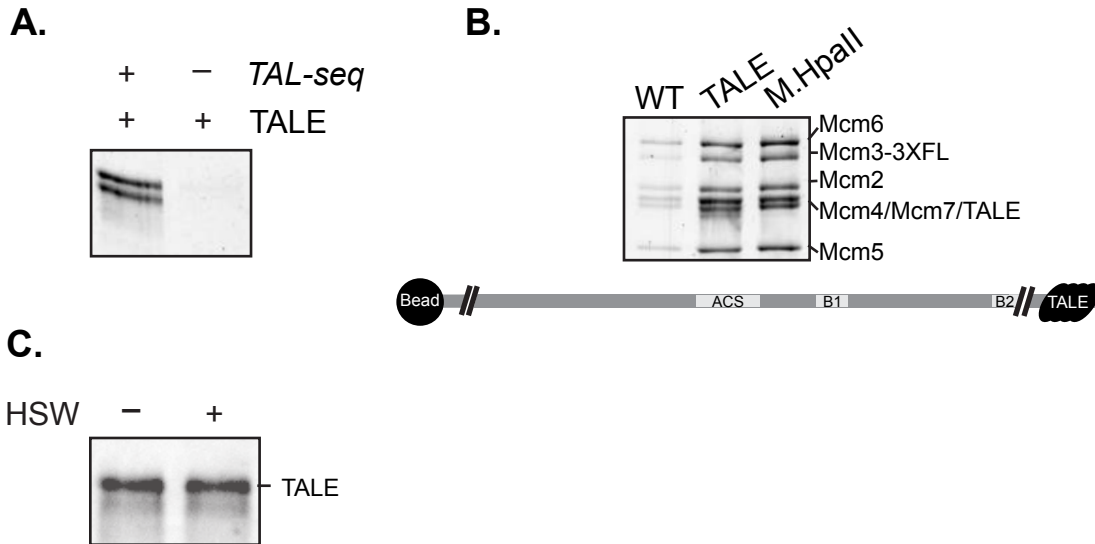

### Characterization of TALE protein DNA binding.

**A)** TALE protein binding is sequence specific. DNA containing or lacking a TALE binding motif were incubated with purified TALE protein for 15 minutes, followed by a high-salt wash. Samples were run on an 8% SDS-PAGE gel and imaged by fluorescent protein staining. TALE binding was only observed when the binding sequence was included in the DNA template.

**B)** TALE or M.HpaII placement at the end of linear DNA templates increase amount of helicases detected. Substantially more helicases remain on the DNA when either TALE or M.HpaII is bound to the end of the template after either 20 min or 30 min of incubation with the helicase loading proteins. This is consistent with both complexes preventing loaded Mcm2-7 complexes from sliding off the end of the DNA during the helicase loading reaction, as has been previously observed (3, 4). A diagram of the location of the TALE binding within the bead-bound DNA is shown below.

**C)** TALE DNA binding is retained after a high-salt wash. After TALE protein was incubated with DNA containing its recognition motif for 15 minutes, free protein was either washed with a low-salt wash (left) or the same high-salt wash containing 500mM NaCl used to detect Mcm2-7 double-hexamers formation (right).

## Figure S4

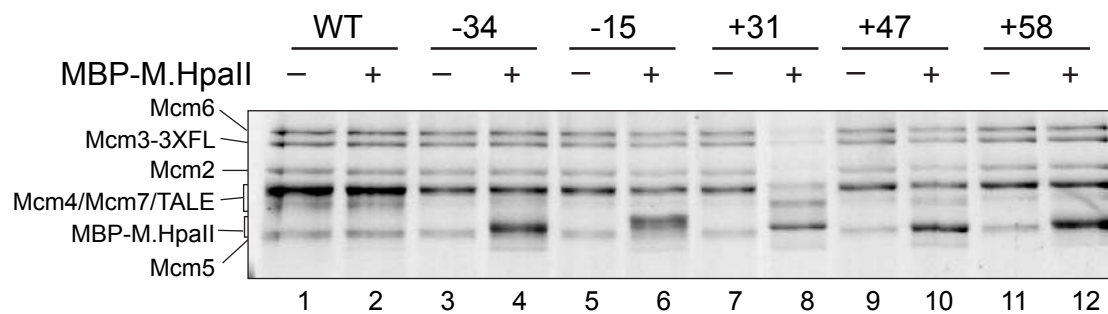

**Increasing the size of the protein-DNA adduct did not alter the effect on helicase loading.**

Maltose-binding protein was fused to the M.HpaII protein (M.HpaII = 40 kDa, MBP-M.HpaII = 80 kDa) and crosslinked to a subset of the 5FdC-modified *ARS1*-DNA templates. Increasing the size of the M.HpaII adduct did not change the locations where the M.HpaII did or did not affect helicase loading.

## Figure S5

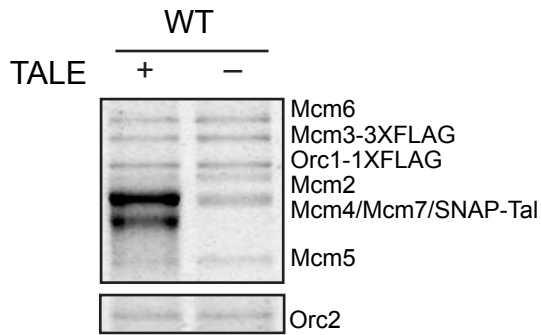

### **TALE binding to the free end of the DNA template does not increase ORC-Cdc6-Cdt1-Mcm2-7 (OCCM) complex formation.**

An OCCM formation assay was performed on wild-type *ARS1*-DNA templates with and without a TALE protein bound to the free end of the DNA. Unlike the situation for the full helicase-loading assay, we observed no difference in the extent of OCCM intermediate formation in the presence or absence of the TALE protein.

## Figure S6

```

...TTTGATTCCATTGCGGTGAAATGGTAAAAGTCAACCCCTGCGATGTAT
      TAL-seq  TAL-seq  TAL-seq
ATTTTCCTGTACAATCAATCAAAAAGCCAAATGATTTAGCATTATCTTTAC
      -45      -35      -25
ATCTTGTTATTTTACAGATTTTATGTTTAGATCTTTTATGCTTGCTTTCA
      ACS                      B1
AAAGGCCTGCAGGCAAGTGCACAAACAA TACTTAAATAAATACTACTCAGT
      +47      +58      B2 +67      +79
AATAACCTATTTCTTAGCATTTTGGACGAAATTGCTATTTTG...
      B3

TAL-seq = GACGTCTGAACTTGACTATATCTTATA
           TALE binding motif

```

### Locations of TALE-consensus sequence insertions

The sequence of the T-rich strand of *ARS1* is shown. Key sequence features of the origin are highlighted in red and labeled underneath. Locations that were changed to the M.HpaII sequence motif are boxed in grey. Locations where the TALE-binding sequence was inserted are shown by blue vertical lines. The insertion sequence included both the TALE-binding motif and an AatII restriction site and is shown below the *ARS1* sequence.

# Figure S7

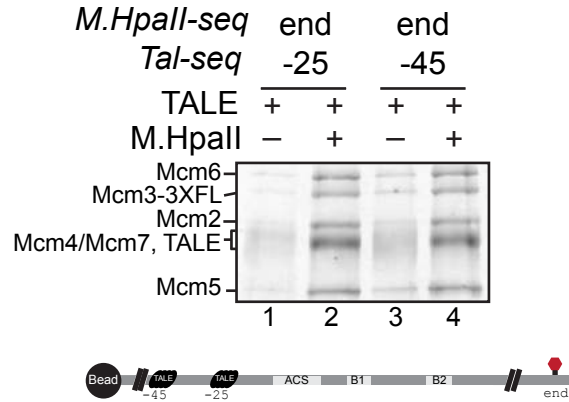

## ***M.HpaII* crosslinking inhibits Mcm2-7 sliding off DNA ends.**

Helicase loading assays were performed in the presence of TALE protein binding with and without *M.HpaII*. The *M.HpaII* recognition sequence was located at the end of the template. Similar to what is observed in Figure S3B, Mcm2-7 signal is retained when *M.HpaII* crosslinked to the end of the DNA template.



## Figure S8

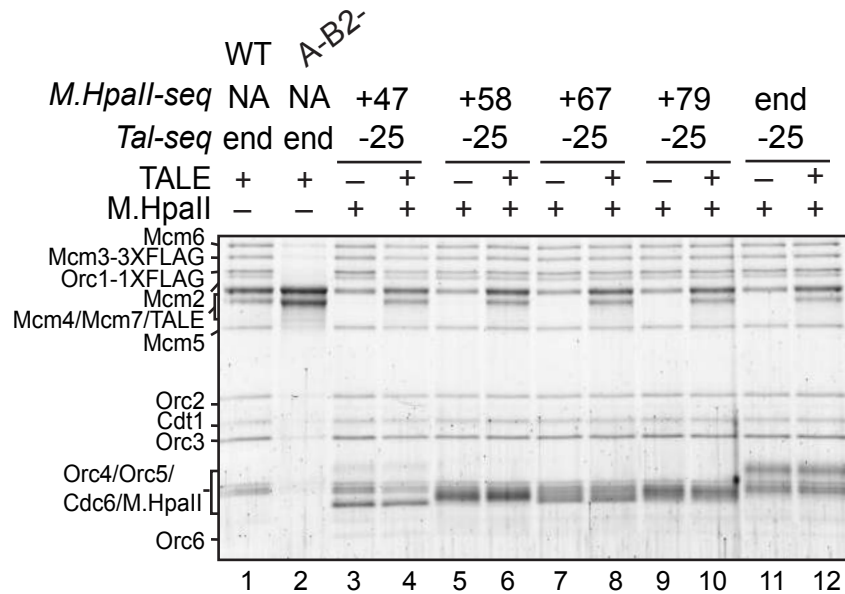

### Proximal origin-flanking roadblocks did not affect OCCM formation.

OCCM formation was assessed using DNA templates in which a TALE binding motif was placed at the -25 location upstream of the ACS and M.HpaII crosslinked at five possible locations downstream of the ACS. The sites of TALE-binding motif insertion and M.HpaII crosslinking are indicated above each template. The presence or absence of TALE protein or M.HpaII crosslinking is indicated. Lanes 1 and 2 show controls using wild-type (WT) ARS1 DNA or ARS1 DNA with a mutant in the ACS and B2 elements (A-B2-). These control templates included a TALE-binding motif at the free-DNA end.

## Figure S9

```
WT   AGATTTTATGTTTAGATC . . . AACCAATA-CTTAAATAAA
A-B2- AGACTCGAGGTTTAGATC . . . AACCGGGCCCGAAATAAA
A-   AGACTCGAGGTTTAGATC . . . AACCAATA-CTTAAATAAA
B2-  AGATTTTATGTTTAGATC . . . AACCGGGCCCGAAATAAA
      ACS                          B2
```

### Mutant *ARS1*-DNA sequences tested.

The T-rich strand of WT and mutant *ARS1* DNA templates used in this study are shown. Only the ACS and B2 elements are shown. The bases mutated in each of the indicated mutations are shown in red.

## Figure S10

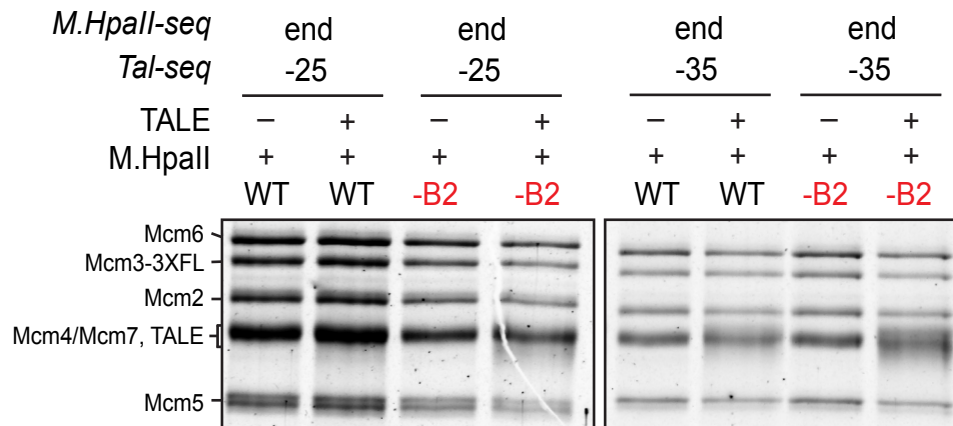

### Distant origin-flanking roadblocks do not result in B2-dependent helicase loading.

The B2 element is not important for stable helicase loading when the TALE protein is bound at -25, or -35 and the M.HpaII is crosslinked at the free end of template (~+280). The sites of TALE-binding motif insertion and M.HpaII crosslinking are indicated above each template. The presence or absence of TALE protein or M.HpaII crosslinking is indicated. The presence of a wild-type (WT) or mutant (B2-) B2 motif in the template is indicated

## Figure S11

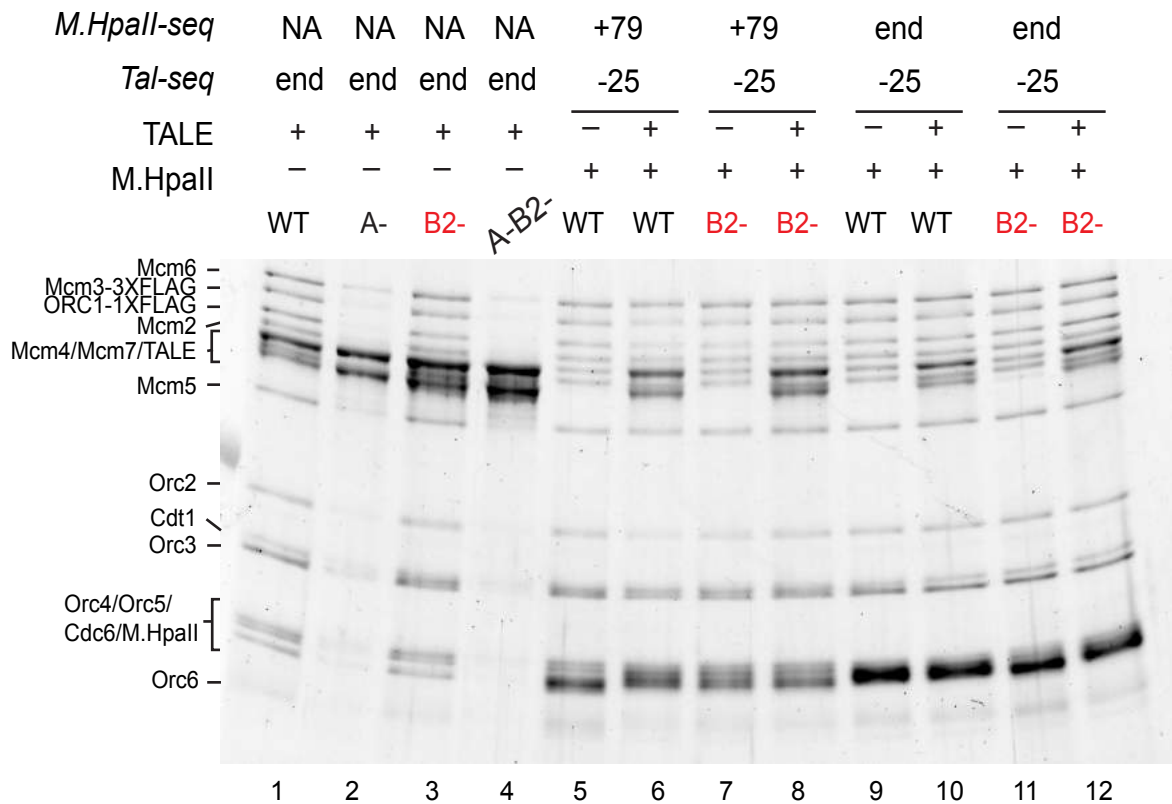

### OCCM formation is not inhibited by mutation of B2 in the presence of origin-proximal roadblocks

OCCM formation assays were performed on a subset of templates used in Figure 5C. The sites of TALE-binding motif insertion and *M.HpaII* crosslinking are indicated above each template. The presence or absence of TALE protein or *M.HpaII* crosslinking is indicated. Lanes 1-4 show control reactions with the indicated ARS1 mutations (see Fig. S9) and these templates include a TALE-binding motif at the free end of the DNA template. Although clear defects in OCCM formation were observed when the ACS was mutated, no detectable changes in OCCM formation were observed in either WT or B2- templates with single or origin-proximal flanking roadblocks.

## Figure S12

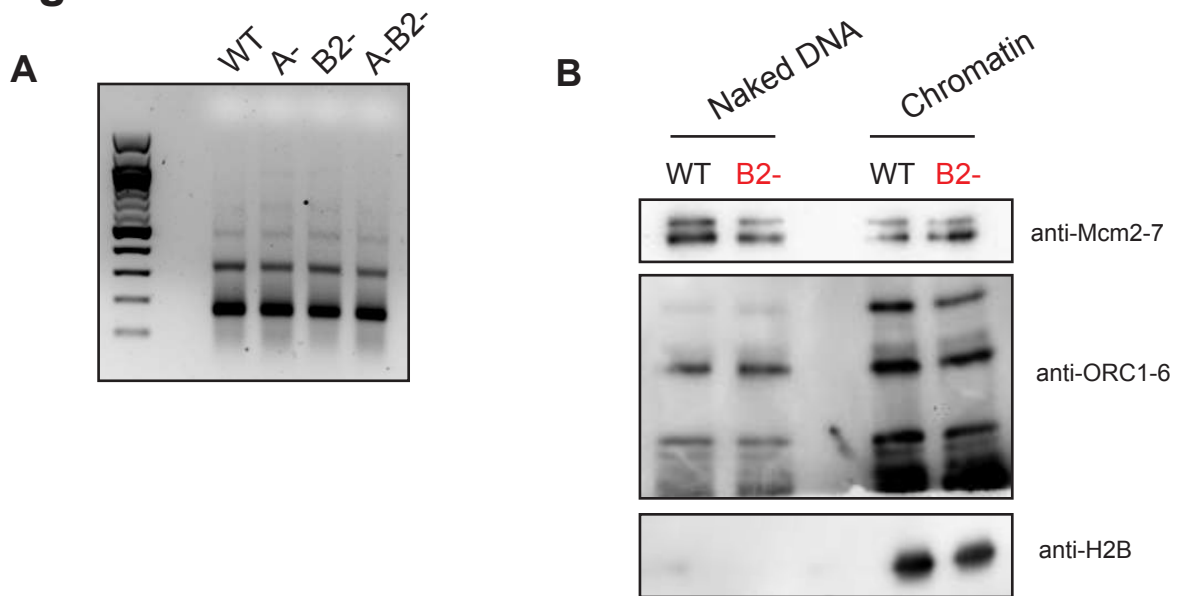

**Origin mutations do not effect the extent of nucleosome assembly or OCCM formation in the presence of nucleosomes.**

**A)** *ARS1*-DNA mutations do not alter the extent of ordered nucleosome assembly on *ARS1* DNA. The indicated wild-type and mutant *ARS1*-DNA templates were assembled into nucleosomes and treated with limiting amounts of MNase.

**B)** OCCM formation is similar on wild-type and B2 mutant *ARS1*-DNA templates. OCCM formation was tested using the indicated templates either as naked DNA or after assembly of the DNA into nucleosomes. Immunoblots comparing Mcm2-7 association, ORC association and histone H2B association are shown.

## Figure S13

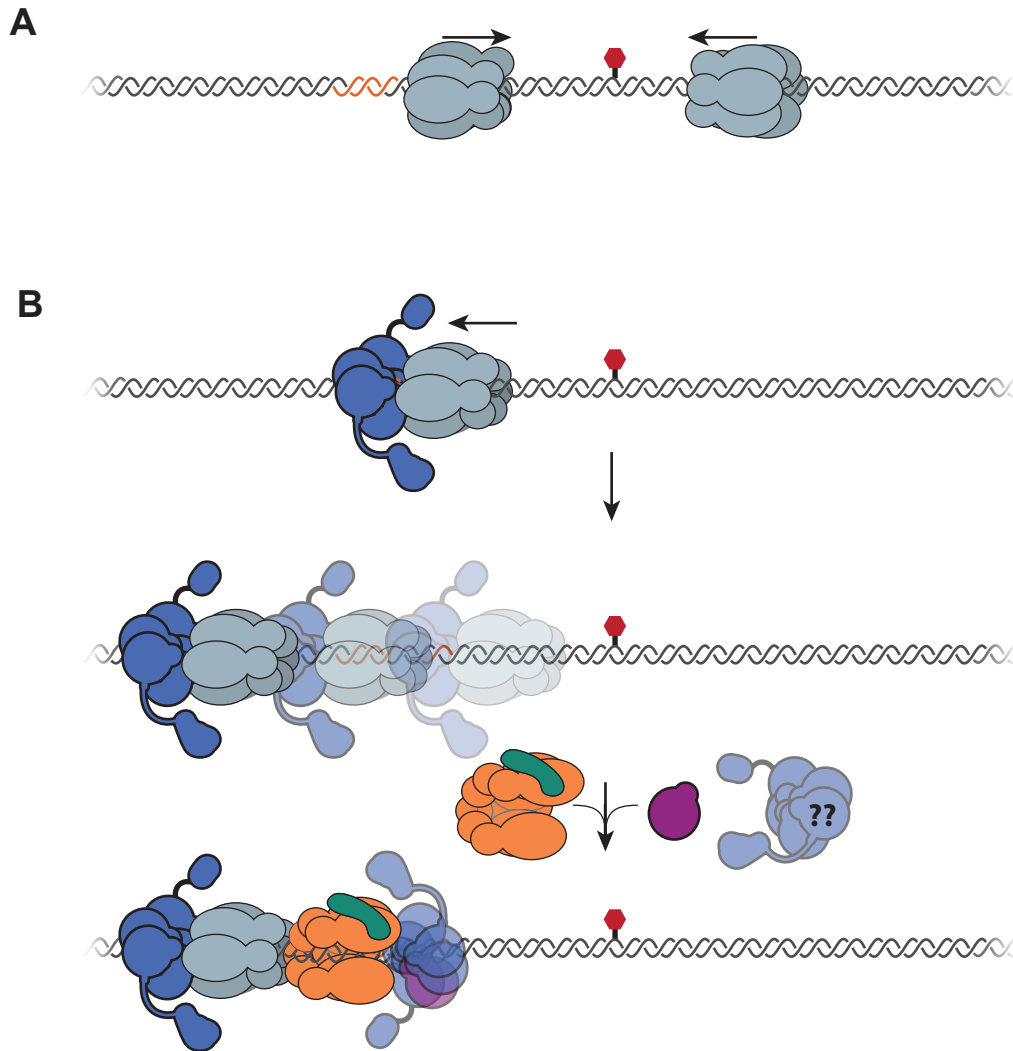

### Models for sliding of Mcm2-7 complexes on origin DNA after initial DNA association

**A.** Movement of helicases after initial DNA association as proposed by Coster and Diffley (2017) (5). Two Mcm2-7 helicases are recruited independently at two separate locations, then slide via an active mechanism to form a double hexamer. Based on current understanding of the direction of the Mcm2-7 complex, such an active mechanism requires the Mcm2-7 complexes to slide towards the M.HpaII adduct pictured.

**B.** Sliding of the helicase based on data presented in this manuscript. For successful double-hexamer formation, a helicase-loading intermediate must slide away from the M.HpaII roadblock, leaving enough space for loading of the second Mcm2-7 hexamer.

**Figure S14**

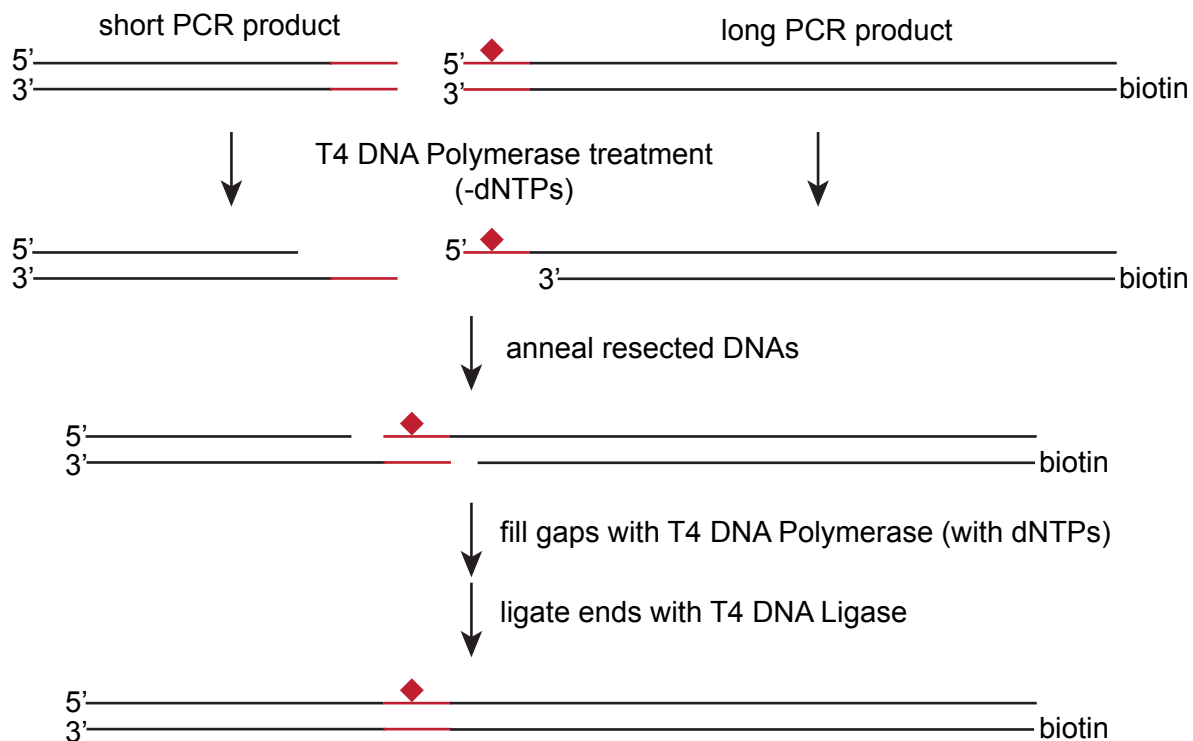

**Illustration of method to produce 5FdC modified ARS1-DNA templates.**

The steps of producing ARS1-DNA templates with a single M.HpaII recognition motif including 5FdC is illustrated. The region of homology between the long and short PCR products includes the M.HpaII site in both products and is shown in red. Only the long PCR product includes a single site of 5FdC-modified DNA. The site of biotin attachment to the DNA is also indicated.

**Table S1:** Strains used in this study

| Strain Name | Strain use                    | Strain details                                                                                                                                                                                                                               | Study? |
|-------------|-------------------------------|----------------------------------------------------------------------------------------------------------------------------------------------------------------------------------------------------------------------------------------------|--------|
| ySK100      | ORC expression strain         | <i>MATa ade2-1 ura3-1 his3-11,15 can1-100 bar1::HisG orc1Δ::HisG pep4Δ::KanMX LEU2::ORC1 TRP1::p404-GAL1-10-ORC3,4 LYS2::plys2-GAL1-10-ORC2,5 HIS3::p403-GAL1-10-1xFlagORC1,6</i>                                                            | (6)    |
| yST144      | Mcm2-7/Cdt1 expression strain | <i>MATa ade2-1 trp1-1 leu2-3,112 his3-11,15 ura3-1 can1-100 bar1Δ::HisG lys2Δ::HisG pep4Δ HIS3::pSKM004 (GAL1,10-MCM2, Flag-MCM3) URA3::pALS1 (GAL1,10-Cdt1, GAL4) LYS2::pSKM002 (GAL1,10-MCM4, MCM5) TRP1::pSKM003 (GAL1,10-MCM6, MCM7)</i> | (8)    |

**Table S2:** Oligonucleotides used in this study

| Oligo Name    | Oligo Sequence (5'-->3')                               | Study?     |
|---------------|--------------------------------------------------------|------------|
| +79 FWD B2-   | GCCCGAAATAAATACTACCGGGTAATAACCTATTTCTTAGC              | This Study |
| +79 REV B2-   | GAAATAGGTTATTACC(5FdC)GGTAGTATTTATTTCTGGGCC CGG        | This Study |
| biopUC19 seqA | (5biodT)GATCGGTGCGGGCCTCTTCGC                          | (6)        |
| pUC19 seq A   | GATCGGTGCGGGCCTCTTCGC                                  | (6)        |
| SNAP-Tal seqB | GATATCTATAAGATATAGTCAAGTTCCTGACTGACTGGGTTGGA AGGC      | This Study |
| Nco Pri1      | CTGACTGGGTTGGAAGGCAAGAGAGCC                            | This Study |
| +79 REV       | GAAATAGGTTATTACC(5FdC)GGTAGTATTTATTTAAGTATT GTTTGTGC   | This Study |
| +67 REV       | CTGAGTAGTATTTT(5FdC)GGAAGTATTGTTTGTGCACTTG             | This Study |
| +58 REV       | GTATTTATTTAAGTAC(5FdC)GGTTGTGCACTTGCCTGC               | This Study |
| +47 REV       | AGTATTGTTTGTGCAC(5FdC)GGCCTGCAGGCCTTTTG                | This Study |
| +38 REV       | GTGCACTTGCCTGCC(5FdC)GGCTTTTGAAAAGCAAGCATA AAAG        | This Study |
| +23 REV       | GCAGGCCTTTTGAAAAGC(5FdC)GGCATAAAAGATCTAAAC ATAAAATCTG  | This Study |
| +14 REV       | GAAAAGCAAGCATAAC(5FdC)GGTCTAAACATAAAATCTGT AAAATAACAAG | This Study |
| -5 REV        | GATCTAAACATAAAATCC(5FdC)GGAAATAACAAGATGTAA AGATAATGC   | This Study |



|                |                                                                   |               |
|----------------|-------------------------------------------------------------------|---------------|
| -10 REV        | ACATAAAATCTGTAAC(5FdC)GGACAAGATGTAAAGATAAT<br>GCTAAATC            | This<br>Study |
| -15 REV        | TCTGTAAAATAAC(5FdC)GGATGTAAAGATAATGCTAAATCA<br>TTTG               | This<br>Study |
| -20 REV        | TGTAAAATAACAAGAC(5FdC)GGAAGATAATGCTAAATCAT<br>TTGGC               | This<br>Study |
| -25 REV        | AATAACAAGATGTAAC(5FdC)GGAATGCTAAATCATTG<br>TTTTG                  | This<br>Study |
| -34 REV        | ATGTAAAGATAATGCC(5FdC)GGTCATTTGGCTTTTTGATT<br>GATTG               | This<br>Study |
| +58 FWD        | CAGGCAAGTGCACAACCGGTACTTAAATAAATACTACTCA<br>GTAATAACC             | This<br>Study |
| +47 FWD        | CAAAGGCCTGCAGGCCGGTGCACAAACAATACTTAAATA<br>AATAC                  | This<br>Study |
| +38 FWD        | GCTTTTCAAAGCCGGGCAGGCAAGTGAC                                      | This<br>Study |
| +23 FWD        | GATCTTTTATGCCGGCTTTTCAAAGGCCTGC                                   | This<br>Study |
| +14 FWD        | GATTTTATGTTTAGACCGTTATGCTTGCTTTTCAAAGG                            | This<br>Study |
| -5 FWD         | ATCTTTACATCTTGTCCGGTTACAGATTTTATGTTTAGATCT<br>TTTATG              | This<br>Study |
| -10 FWD        | ATCTTTACATCTTGTCCGGTTACAGATTTTATGTTTAGATCT<br>TTTATG              | This<br>Study |
| -15 FWD        | AGCATTATCTTTACATCCGGTTATTTTACAGATTTTATGTT<br>AGATC                | This<br>Study |
| -20 FWD        | ATTTAGCATTATCTTCCGGTCTTGTTATTTTACAGATTTTAT<br>GTTTAG              | This<br>Study |
| -25 FWD        | CAAATGATTTAGCATTCCGGTTACATCTTGTTATTTTACAGA<br>TTTTATG             | This<br>Study |
| -34 FWD        | CAAAAAGCCAAATGACCGGGCATTATCTTTACATCTTGTTA<br>TTTTAC               | This<br>Study |
| Tal Insert -25 | GTAAAATAACAAGATGTAAAGTGAACCTGACTATATCTTAT<br>AATAATGCTAAATCATTG   | This<br>Study |
| Tal Insert -35 | GTAAAGATAATGCTAAAGACGTCTGAACCTGACTATATCTT<br>ATATCATTGCTTTTTGATTG | This<br>Study |
| Tal Insert -45 | GATAATGCTAAATCATTGGCTGAACCTGACTATATCTTATA<br>TTTTTGATTGATTGTAC    | This<br>Study |

**Table S3:** Plasmids used in this study

| <b>Plasmid Name</b>       | <b>Construct contains</b>                               | <b>Study?</b> |
|---------------------------|---------------------------------------------------------|---------------|
| pM15MH                    | M.HpaII Expression plasmid                              | (2)           |
| pM15MH-MBP                | M.HpaII with a C terminal MBP tag                       | This study    |
| pSNAP-Tale                | TALE protein with SNAP tag                              | This study    |
| pUC19 ARS1                | <i>ARS1</i> WT                                          | (7)           |
| pUC19 ARS1 NcoI           | <i>ARS1</i> WT with flanking NcoI sites                 | This study    |
| pUC19 ARS1-A-             | <i>ARS1</i> with a mutation in the A element            | This study    |
| pUC19 ARS1-B2-            | <i>ARS1</i> with a mutation in the B2 element           | This study    |
| pUC19 ARS1-A-B2-          | <i>ARS1</i> with mutations in the A and B2 elements     | (7)           |
| pUC19 ARS1 -25 Talseq     | <i>ARS1</i> WT with a TALE recognition sequence at -25  | This study    |
| pUC19 ARS1 -35 Talseq     | <i>ARS1</i> WT with a TALE recognition sequence at -35  | This study    |
| pUC19 ARS1 -45 Talseq     | <i>ARS1</i> WT with a TALE recognition sequence at -45  | This study    |
| pUC19 ARS1 -25 Talseq B2- | <i>ARS1</i> B2- with a TALE recognition sequence at -25 | This study    |
| pUC19 ARS1 -35 Talseq B2- | <i>ARS1</i> B2- with a TALE recognition sequence at -35 | This study    |
| pUC19 ARS1 -45 Talseq B2- | <i>ARS1</i> B2- with a TALE recognition sequence at -45 | This study    |
| pARS1 Nco/Nco WT          | <i>ARS1</i> WT construct for nucleosomal templates      | (6)           |
| pARS1 Nco/Nco A-          | <i>ARS1</i> A- construct for nucleosomal templates      | (6)           |
| pARS1 Nco/Nco B2-         | <i>ARS1</i> B2- construct for nucleosomal templates     | (6)           |
| pARS1 Nco/Nco A-B2-       | <i>ARS1</i> A-B2- construct for nucleosomal templates   | (6)           |

### Supplemental References:

1. Long, D. T., Joukov, V., Budzowska, M., and Walter, J. C. (2014) BRCA1 promotes unloading of the CMG helicase from a stalled DNA replication fork. *Mol. Cell.* **56**, 174–85
2. Duxin, J. P., Dewar, J. M., Yardimci, H., and Walter, J. C. (2014) Repair of a DNA-Protein Crosslink by Replication-Coupled Proteolysis. *Cell.* **159**, 346–57
3. Remus, D., Beuron, F., Tolun, G., Griffith, J. D., Morris, E. P., Diffley, J. F. X., Remus, D., and Beuron, F. (2009) Concerted Loading of Mcm2-7 Double Hexamers around DNA during DNA Replication Origin Licensing. *Cell.* **139**, 719–730
4. Evrin, C., Clarke, P., Zech, J., Lurz, R., Sun, J., Uhle, S., Li, H., Stillman, B., and Speck, C. (2009) A double-hexameric MCM2-7 complex is loaded onto origin DNA during licensing of eukaryotic DNA replication. *Proc. Natl. Acad. Sci. U. S. A.* **106**, 20240–5
5. Coster, G., and Diffley, J. F. X. (2017) Bidirectional eukaryotic DNA replication is established by quasi-symmetrical helicase loading. *Science (80-. ).* **357**, 314–318
6. Kang, S., Warner, M. D. D., and Bell, S. P. P. (2014) Multiple Functions for Mcm2-7 ATPase Motifs during Replication Initiation. *Mol. Cell.* **55**, 655–65
7. Heller, R. C., Kang, S., Lam, W. M., Chen, S., Chan, C. S., and Bell, S. P. (2011) Eukaryotic origin-dependent DNA replication in vitro reveals sequential action of DDK and S-CDK kinases. *Cell.* **146**, 80–91
8. Ticau, S., Friedman, L. J., Ivica, N. A., Gelles, J., and Bell, S. P. (2015) Single-molecule studies of origin licensing reveal mechanisms ensuring bidirectional helicase loading. *Cell.* **161**, 513–25
